# Supplementary material for: Characterization, bio-uptake and toxicity of polymer-coated silver nanoparticles and their interaction with human peripheral blood mononuclear cells
Source: publisher site journal article supplement (doi:10.3762/bjnano.12.23), 2021-03-24
Supplement: Additional file 1 [file 2190-4286-12-23-S1.pdf]

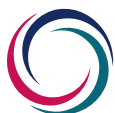

## Supporting Information

for

### **Characterization, bio-uptake and toxicity of polymer-coated silver nanoparticles and their interaction with human peripheral blood mononuclear cells**

Sahar Pourhoseini, Reilly T. Enos, Angela E. Murphy, Bo Cai and Jamie R. Lead

*Beilstein J. Nanotechnol.* **2021**, *12*, 282–294. [doi:10.3762/bjnano.12.23](https://doi.org/10.3762/bjnano.12.23)

## Supplementary figures and tables

**Table S1:** Extinction coefficients. Extinction coefficient calculated based on the Beer–Lambert law.

|                                        |                         | Extinction Coefficients (Lmg <sup>-1</sup> cm <sup>-1</sup> ) |                         |                         |                         |                         |                         |
|----------------------------------------|-------------------------|---------------------------------------------------------------|-------------------------|-------------------------|-------------------------|-------------------------|-------------------------|
|                                        |                         | 0h                                                            | 1h                      | 3h                      | 6h                      | 12h                     | 24h                     |
| Concentration<br>(µg L <sup>-1</sup> ) | 100 µg L <sup>-1</sup>  | 8.88 × 10 <sup>-3</sup>                                       | 7.42 × 10 <sup>-3</sup> | 8.97 × 10 <sup>-3</sup> | 4.51 × 10 <sup>-3</sup> | 6.59 × 10 <sup>-3</sup> | 6.06 × 10 <sup>-3</sup> |
|                                        | 500 µg L <sup>-1</sup>  | 2.47 × 10 <sup>-3</sup>                                       | 1.92 × 10 <sup>-2</sup> | 1.31 × 10 <sup>-3</sup> | 1.88 × 10 <sup>-2</sup> | 2.12 × 10 <sup>-3</sup> | 1.7 × 10 <sup>-3</sup>  |
|                                        | 1000 µg L <sup>-1</sup> | 5.88 × 10 <sup>-4</sup>                                       | 1.04 × 10 <sup>-3</sup> | 6.42 × 10 <sup>-4</sup> | 7.36 × 10 <sup>-4</sup> | 5.24 × 10 <sup>-4</sup> | 9.23 × 10 <sup>-4</sup> |

**Table S2:** Mass balance of Ag. Ag mass balance (ng) in 2.5 × 10<sup>5</sup> cells (absorbed or cell surface-attached) in AgNP and AgNO<sub>3</sub> treatments for each six individual measured by ICP-MS. Data are presented as mean ± standard error (n = 3).

Person 1

|                   |             | Mass of Ag in exposure (ng) |       |        |        |
|-------------------|-------------|-----------------------------|-------|--------|--------|
|                   |             | 10                          | 100   | 500    | 1000   |
| PVP-AgNP          | cell        | 0.06                        | 0.31  | 1.76   | 5.41   |
|                   | Supernatant | 6.23                        | 38.02 | 153.61 | 312.95 |
|                   | Total loss  | 3.71                        | 61.67 | 344.62 | 681.63 |
| AgNO <sub>3</sub> | cell        | 0.05                        | 0.32  | 4.54   | 8.14   |
|                   | Supernatant | 5.85                        | 57.03 | 120    | 119.42 |
|                   | Total loss  | 4.1                         | 42.65 | 375.46 | 872.43 |

Person 2

|                   |             | Mass of Ag in exposure (ng) |       |        |        |
|-------------------|-------------|-----------------------------|-------|--------|--------|
|                   |             | 10                          | 100   | 500    | 1000   |
| PVP-AgNP          | cell        | 0.06                        | 0.34  | 2.13   | 4.57   |
|                   | Supernatant | 3.59                        | 33.17 | 163.68 | 425.14 |
|                   | Total loss  | 6.53                        | 66.49 | 334.19 | 570.3  |
| AgNO <sub>3</sub> | cell        | 0.05                        | 0.3   | 4.98   | 14.44  |
|                   | Supernatant | 6.21                        | 41.29 | 119.86 | 142.15 |
|                   | Total loss  | 3.74                        | 58.4  | 375.16 | 843.42 |

Person 3

|                   |             | Mass of Ag in exposure (ng) |       |        |        |
|-------------------|-------------|-----------------------------|-------|--------|--------|
|                   |             | 10                          | 100   | 500    | 1000   |
| PVP-AgNP          | cell        | 0.07                        | 0.51  | 2.75   | 5.96   |
|                   | Supernatant | 4.53                        | 39.64 | 301.33 | 457.06 |
|                   | Total loss  | 5.4                         | 59.85 | 195.93 | 536.97 |
| AgNO <sub>3</sub> | cell        | 0.06                        | 0.42  | 4.97   | 6.95   |
|                   | Supernatant | 4.78                        | 43.79 | 121.87 | 198.16 |
|                   | Total loss  | 5.16                        | 55.79 | 373.16 | 794.88 |

| Person 4          |             | Mass of Ag in exposure (ng) |       |        |        |
|-------------------|-------------|-----------------------------|-------|--------|--------|
|                   |             | 10                          | 100   | 500    | 1000   |
| PVP-AgNP          | cell        | 0.07                        | 0.46  | 3.58   | 6.78   |
|                   | Supernatant | 4.55                        | 48.19 | 206.93 | 404.74 |
|                   | Total loss  | 5.38                        | 51.35 | 289.49 | 588.48 |
| AgNO <sub>3</sub> | cell        | 0.08                        | 0.51  | 5.5    | 11.86  |
|                   | Supernatant | 5.35                        | 70.86 | 119.85 | 163.53 |
|                   | Total loss  | 4.57                        | 28.64 | 374.65 | 824.61 |

| Person 5          |             | Mass of Ag in exposure (ng) |       |        |        |
|-------------------|-------------|-----------------------------|-------|--------|--------|
|                   |             | 10                          | 100   | 500    | 1000   |
| PVP-AgNP          | cell        | 0.08                        | 0.38  | 2.63   | 4.31   |
|                   | Supernatant | 6.15                        | 45.34 | 213.65 | 409.12 |
|                   | Total loss  | 3.76                        | 54.28 | 283.73 | 586.57 |
| AgNO <sub>3</sub> | cell        | 0.08                        | 0.39  | 4.47   | 13.54  |
|                   | Supernatant | 5.19                        | 69.46 | 120.05 | 158.99 |
|                   | Total loss  | 4.73                        | 30.16 | 375.48 | 827.47 |

| Person 6          |             | Mass of Ag in exposure (ng) |       |        |        |
|-------------------|-------------|-----------------------------|-------|--------|--------|
|                   |             | 10                          | 100   | 500    | 1000   |
| PVP-AgNP          | cell        | 0.07                        | 0.32  | 1.56   | 2.79   |
|                   | Supernatant | 5.99                        | 50.41 | 237.4  | 510.26 |
|                   | Total loss  | 3.94                        | 49.27 | 261.04 | 486.95 |
| AgNO <sub>3</sub> | cell        | 0.07                        | 0.23  | 2.91   | 8.84   |
|                   | Supernatant | 5.57                        | 76.22 | 120.41 | 199.83 |
|                   | Total loss  | 4.36                        | 23.55 | 376.68 | 791.32 |

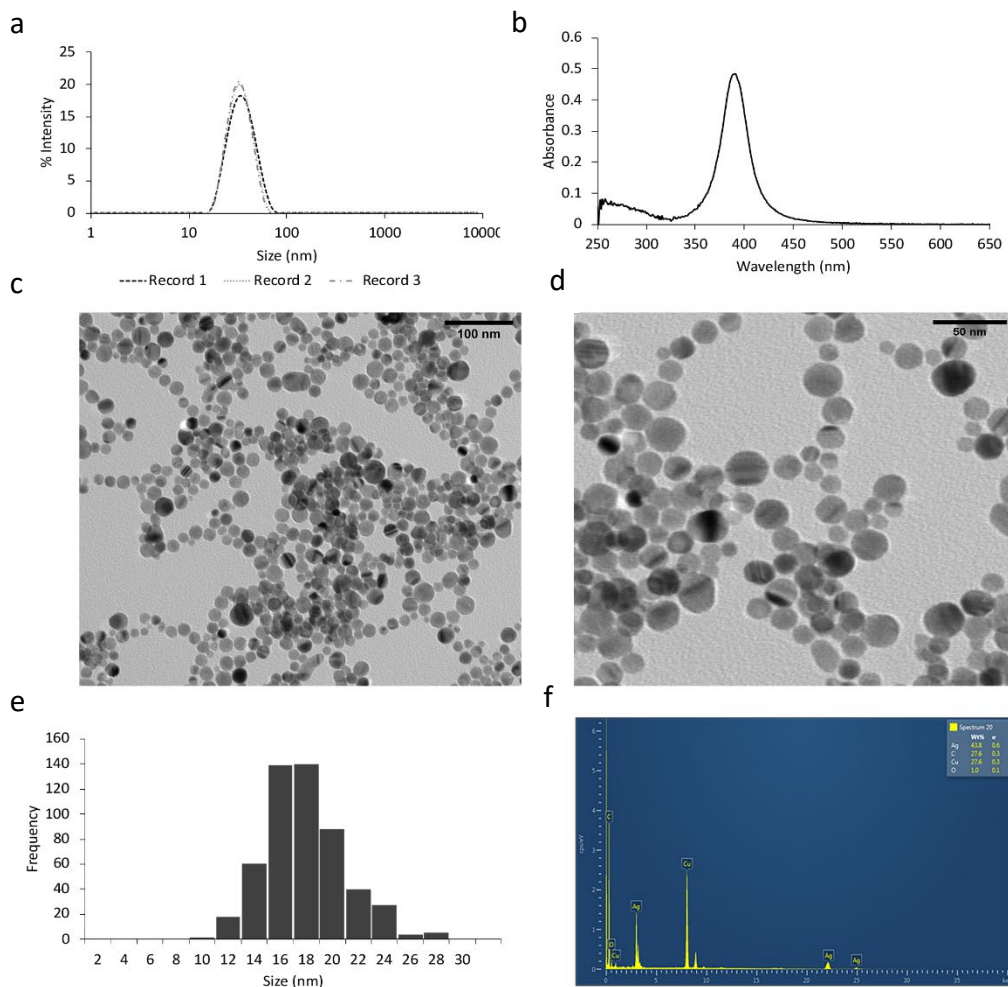

**Figure S1:** NP characterization results. Characterization of stock PVP-AgNPs using DLS (a), UV-vis spectra (b), TEM images with different magnifications (16.9 nm) and particle size distribution (c-e), and EDX imaging (f).

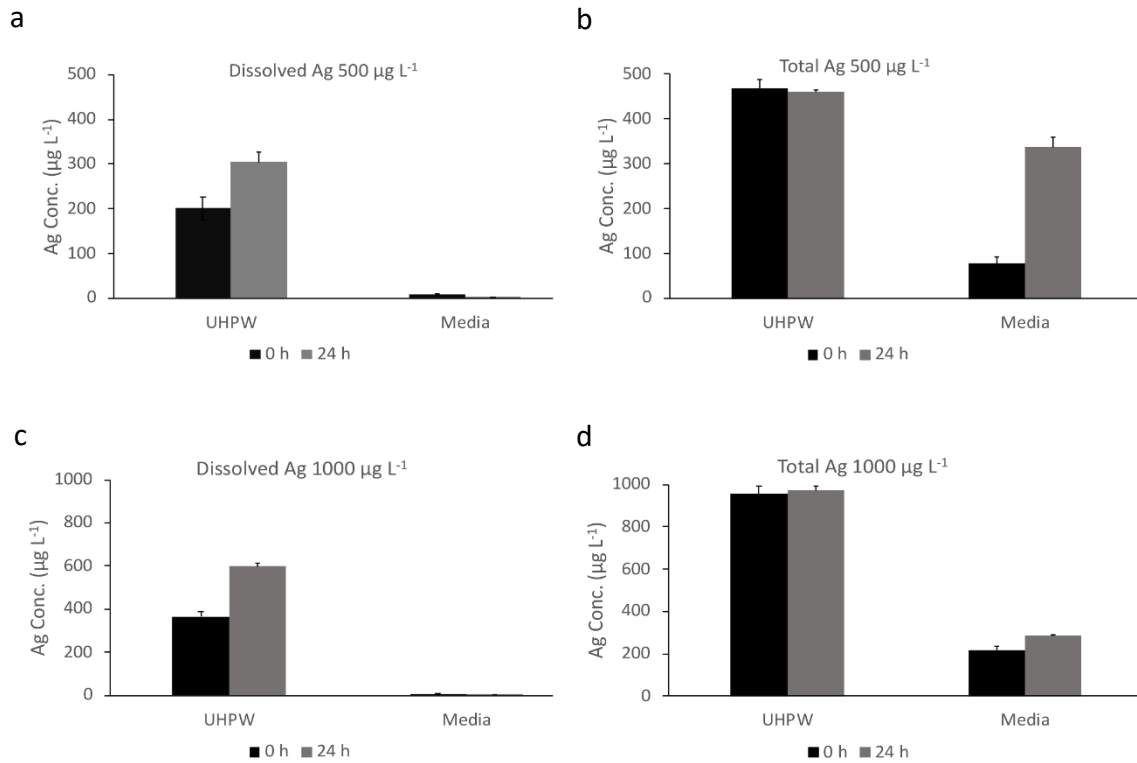

**Figure S2:** Dissolved and total concentration of Ag in  $\text{AgNO}_3$  in UHPW and RPMI medium. Dissolved Ag concentration measurements using centrifugal ultrafiltration units (a and c) and total Ag concentration (b and d) in UHPW and RPMI medium at  $T = 0$  and  $T = 24$  h measured by ICP-MS. Data are reported as mean  $\pm$  SE ( $n = 3$ ).

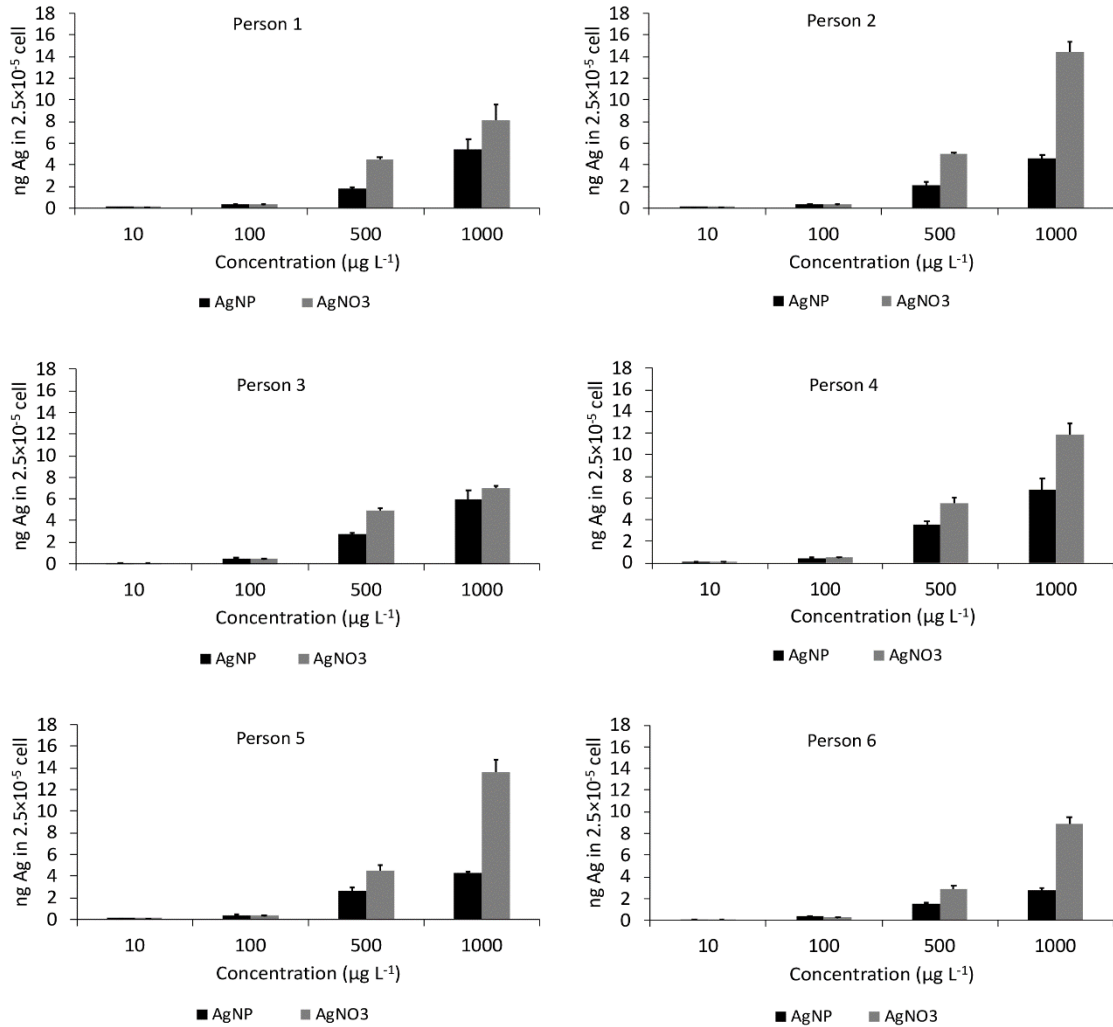

**Figure S3:** Ag uptake (ng) in  $2.5 \times 10^5$  cells. Results for absorbed or cell surface-attached Ag after treatment of PBMCs in six individuals. The amount of Ag in cells after three washes with buffer was measured by ICP-MS.

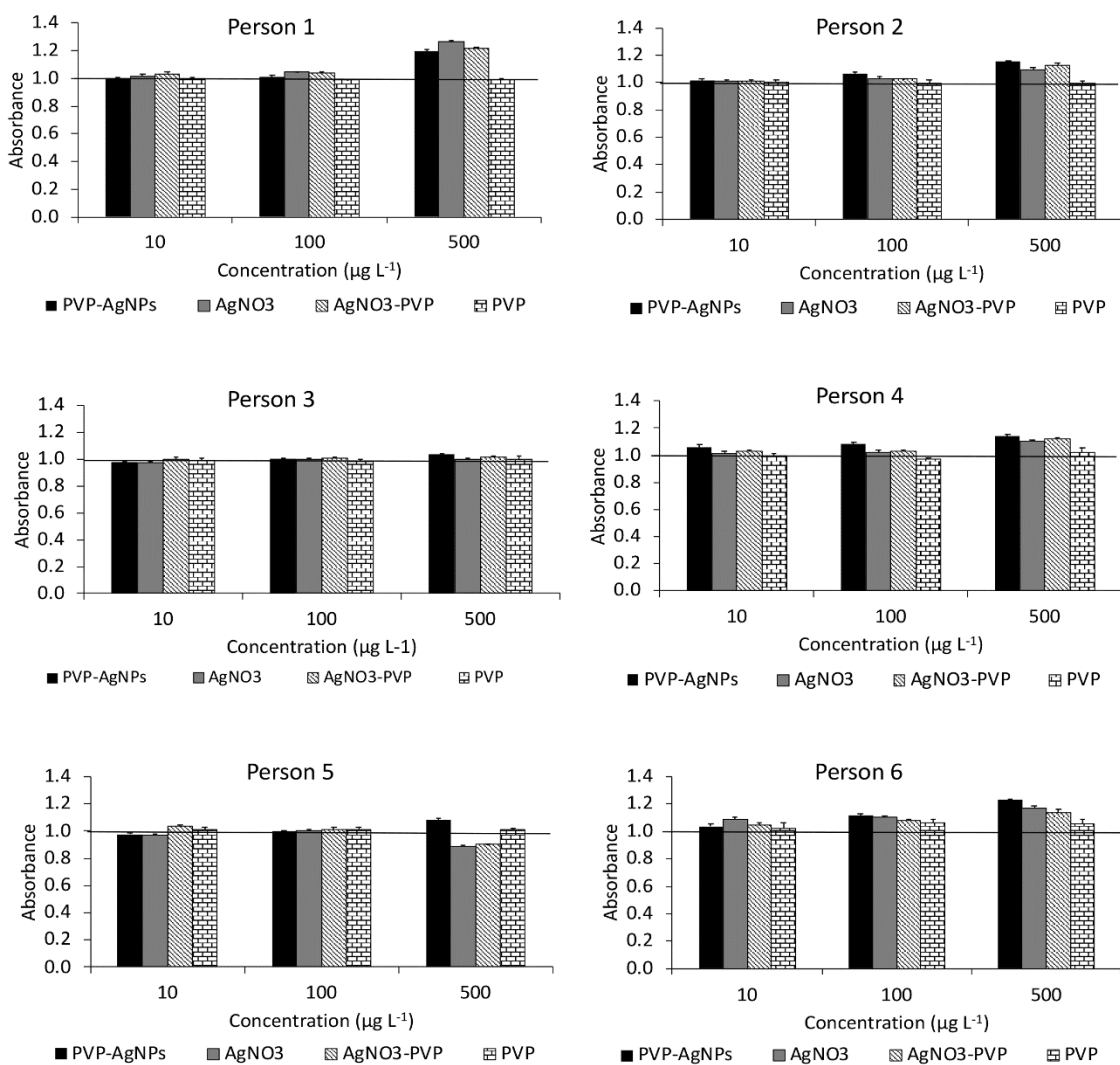

**Figure S4:** Cell viability test. Cell viability of PBMCs assessed by LDH leakage after 24 h of treatment with the given concentrations PVP-AgNPs, AgNO<sub>3</sub>, AgNO<sub>3</sub>-PVP, and PVP. Data represents the means of six replicates ± standard error.

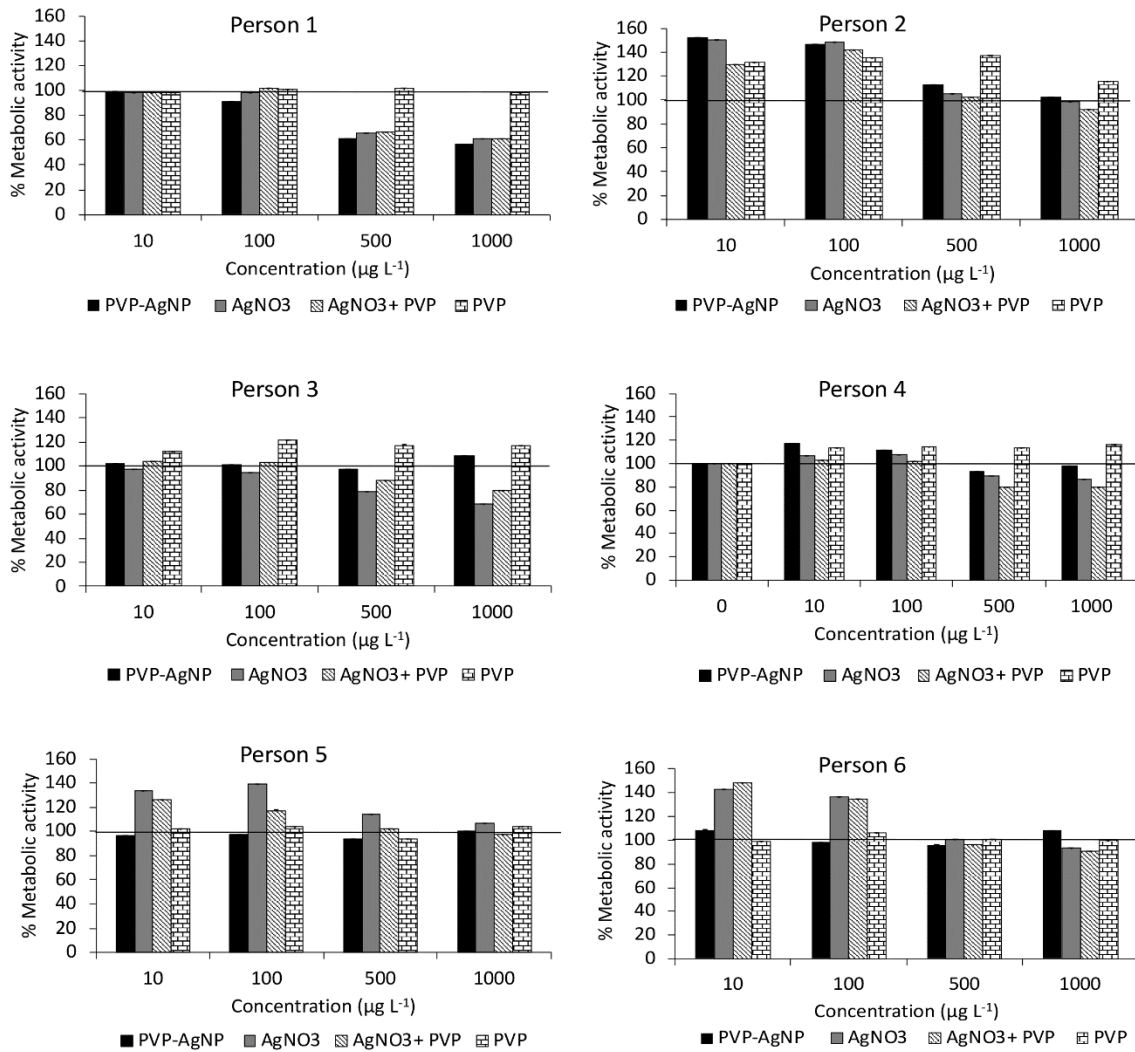

**Figure S5:** Cell metabolic activity. Metabolic activity of PBMCs measured by MTS assay after 24 h of exposure at the given concentrations for six individuals. Data represents the means of six replicates  $\pm$  standard error.
